# Supplementary figures and images for: TCR ligand potency differentially impacts PD-1 inhibitory effects on diverse signaling pathways
Source: PubMed Central journal article supplement — J Exp Med. 2023 Oct 5;220(12):e20231242. doi: 10.1084/jem.20231242 (PMC10555889; doi:10.1084/jem.20231242), 2023-10-05

A

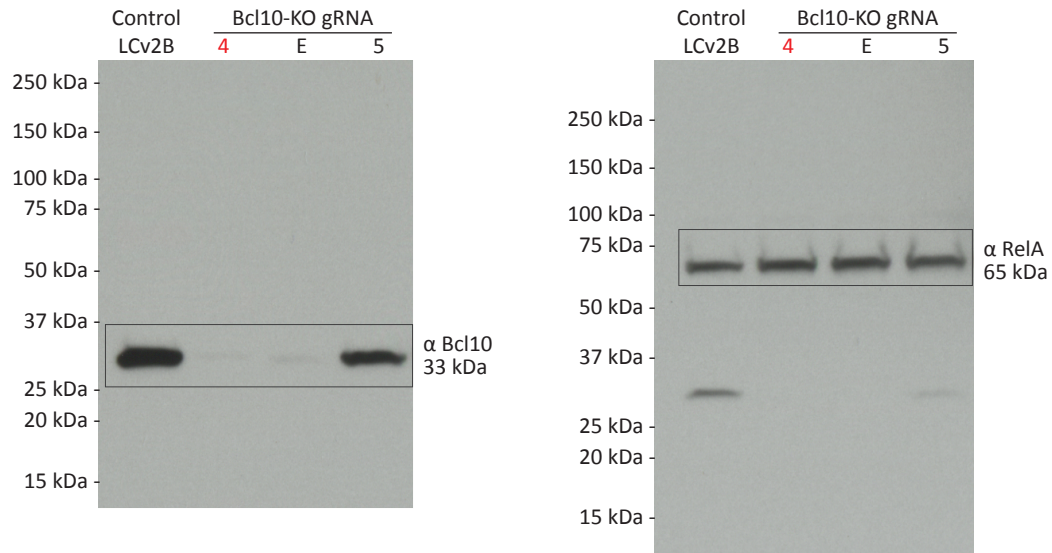

B

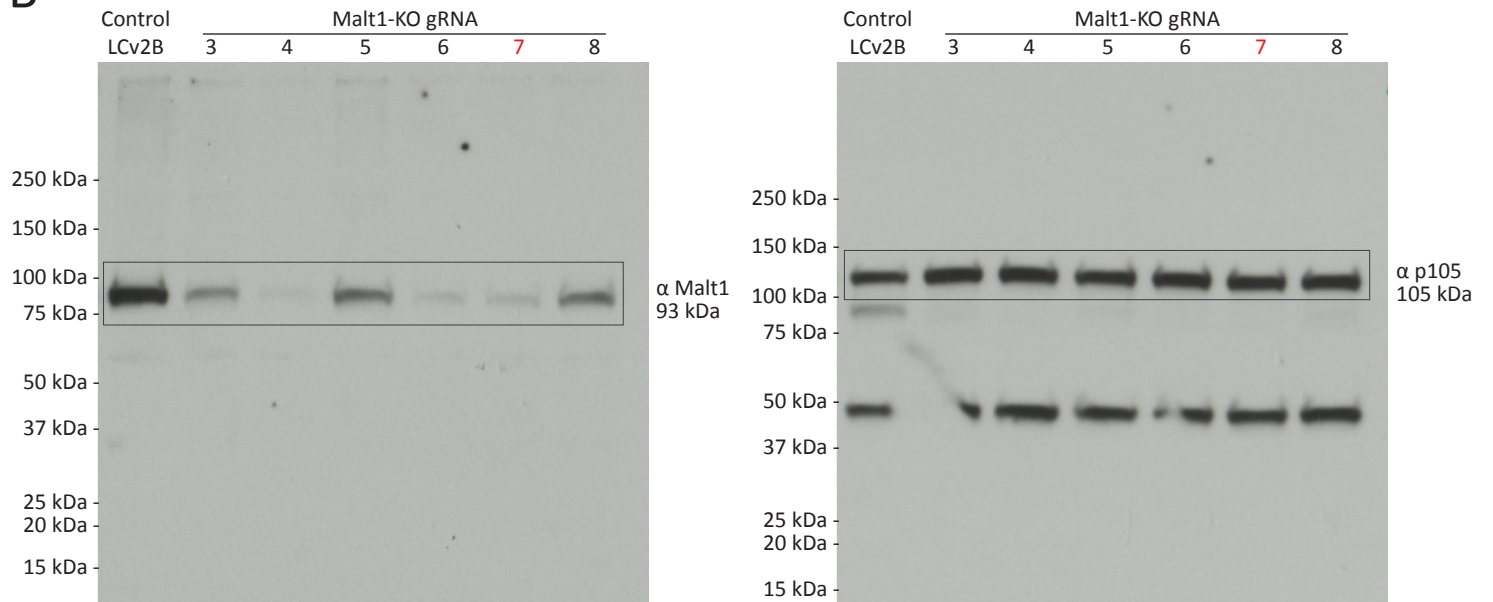

C

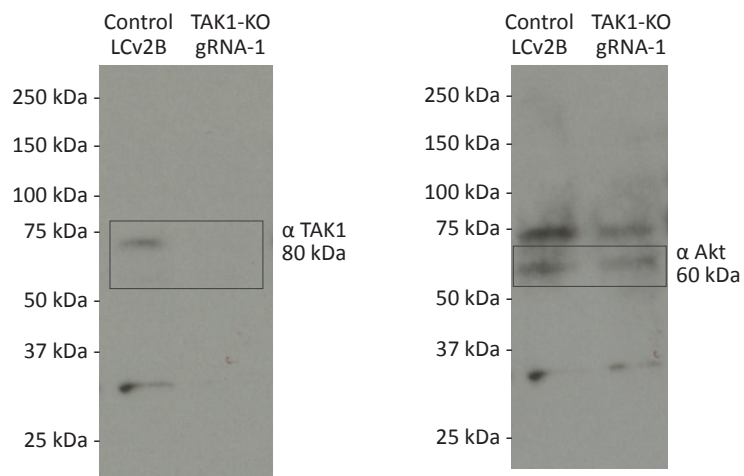

Supplement: JEM_20231242_SourceDataFS1.pdf [file JEM_20231242_SourceDataFS1.pdf]
